# Supplementary material for: Live-cell single particle tracking of PRC1 reveals a highly dynamic system with low target site occupancy
Source: PubMed Central journal article supplement (PMC7873255; doi:10.1038/s41467-021-21130-6), 2021-02-09
Supplement: 41467_2021_21130_MOESM10_ESM.pdf [file 41467_2021_21130_MOESM10_ESM.pdf]

## Reporting Summary

Nature Research wishes to improve the reproducibility of the work that we publish. This form provides structure for consistency and transparency in reporting. For further information on Nature Research policies, see our [Editorial Policies](#) and the [Editorial Policy Checklist](#).

### Statistics

For all statistical analyses, confirm that the following items are present in the figure legend, table legend, main text, or Methods section.

n/a Confirmed

- |                                     |                                     |                                                                                                                                                                                                                                                            |
|-------------------------------------|-------------------------------------|------------------------------------------------------------------------------------------------------------------------------------------------------------------------------------------------------------------------------------------------------------|
| <input type="checkbox"/>            | <input checked="" type="checkbox"/> | The exact sample size ( $n$ ) for each experimental group/condition, given as a discrete number and unit of measurement                                                                                                                                    |
| <input type="checkbox"/>            | <input checked="" type="checkbox"/> | A statement on whether measurements were taken from distinct samples or whether the same sample was measured repeatedly                                                                                                                                    |
| <input type="checkbox"/>            | <input checked="" type="checkbox"/> | The statistical test(s) used AND whether they are one- or two-sided<br><i>Only common tests should be described solely by name; describe more complex techniques in the Methods section.</i>                                                               |
| <input checked="" type="checkbox"/> | <input type="checkbox"/>            | A description of all covariates tested                                                                                                                                                                                                                     |
| <input type="checkbox"/>            | <input checked="" type="checkbox"/> | A description of any assumptions or corrections, such as tests of normality and adjustment for multiple comparisons                                                                                                                                        |
| <input type="checkbox"/>            | <input checked="" type="checkbox"/> | A full description of the statistical parameters including central tendency (e.g. means) or other basic estimates (e.g. regression coefficient) AND variation (e.g. standard deviation) or associated estimates of uncertainty (e.g. confidence intervals) |
| <input type="checkbox"/>            | <input checked="" type="checkbox"/> | For null hypothesis testing, the test statistic (e.g. $F$ , $t$ , $r$ ) with confidence intervals, effect sizes, degrees of freedom and $P$ value noted<br><i>Give <math>P</math> values as exact values whenever suitable.</i>                            |
| <input checked="" type="checkbox"/> | <input type="checkbox"/>            | For Bayesian analysis, information on the choice of priors and Markov chain Monte Carlo settings                                                                                                                                                           |
| <input checked="" type="checkbox"/> | <input type="checkbox"/>            | For hierarchical and complex designs, identification of the appropriate level for tests and full reporting of outcomes                                                                                                                                     |
| <input checked="" type="checkbox"/> | <input type="checkbox"/>            | Estimates of effect sizes (e.g. Cohen's $d$ , Pearson's $r$ ), indicating how they were calculated                                                                                                                                                         |

*Our web collection on [statistics for biologists](#) contains articles on many of the points above.*

### Software and code

Policy information about [availability of computer code](#)

Data collection Image Studio v5.2 (LI-COR), Typhoon FLA 7000 Control Software 1.2 (Fujifilm), Volocity v5.4 (PerkinElmer), Andor Solis (Andor Technology)

Data analysis MATLAB R2013b and R2017b (MathWorks), ImageJ 1.52p through Fiji (Schindelin et al., 2012), Stormtracker v2018 (Uphoff et al., 2013), MACS2 v2.1.1 (Zhang et al., 2008), deepTools v3.0.1 (Ramirez et al., 2014), TANGO v0.99 (Ollion et al., 2013), cellSens v3.1 (Olympus), Spot-On v0.11.5a (Hansen et al., 2018), R v3.6.2 (R Core Team 2019). Polycomb body analysis scripts are available at [<https://github.com/MKHuseyin/Polycomb-Body-Analysis>].

For manuscripts utilizing custom algorithms or software that are central to the research but not yet described in published literature, software must be made available to editors and reviewers. We strongly encourage code deposition in a community repository (e.g. GitHub). See the Nature Research [guidelines for submitting code & software](#) for further information.

### Data

Policy information about [availability of data](#)

All manuscripts must include a [data availability statement](#). This statement should provide the following information, where applicable:

- Accession codes, unique identifiers, or web links for publicly available datasets
- A list of figures that have associated raw data
- A description of any restrictions on data availability

The ChIP-seq datasets analysed in this current study are available in the GEO repository, with the accession codes GSE132752 and GSE119618. Read counts at RING1B peaks from the ChIP-seq datasets used are available in Table S3.

## Field-specific reporting

Please select the one below that is the best fit for your research. If you are not sure, read the appropriate sections before making your selection.

Life sciences  Behavioural & social sciences  Ecological, evolutionary & environmental sciences

For a reference copy of the document with all sections, see [nature.com/documents/nr-reporting-summary-flat.pdf](https://www.nature.com/documents/nr-reporting-summary-flat.pdf)

## Life sciences study design

All studies must disclose on these points even when the disclosure is negative.

|                 |                                                                                                                                                                                                                                                                                                                                                                                                                                                                                                                                                                                                         |
|-----------------|---------------------------------------------------------------------------------------------------------------------------------------------------------------------------------------------------------------------------------------------------------------------------------------------------------------------------------------------------------------------------------------------------------------------------------------------------------------------------------------------------------------------------------------------------------------------------------------------------------|
| Sample size     | Sample sizes were determined based on estimates from preliminary experiments in order to obtain sufficient numbers of molecules (in single molecule imaging experiments) or cells (in whole cell-based methods, such as FRAP, Polycomb body analysis) per imaging experiment to allow for robust processing with analysis software and statistical analysis (for similar studies see e.g. Rhodes et al., Scc2/Nipbl hops between chromosomal cohesin rings after loading, eLife (2017), Hansen et al., Robust model-based analysis of single-particle tracking experiments with Spot-On, eLife (2018).) |
| Data exclusions | No data were excluded.                                                                                                                                                                                                                                                                                                                                                                                                                                                                                                                                                                                  |
| Replication     | Quantified experimental findings reported in this study were reliably reproduced in multiple biological replicates. The numbers of cells (FRAP and Polycomb body quantification, other cellular imaging approaches), movies (single particle tracking), or experimental replicates (protein quantification, ChIP-seq analysis, western blotting, other aggregate analyses) are given in the figure legends.                                                                                                                                                                                             |
| Randomization   | Randomization was not relevant to this study. In all experiments the genotypes of cell lines being studied were known, and were therefore used to allocate samples into experimental groups. Randomization was therefore not appropriate or relevant.                                                                                                                                                                                                                                                                                                                                                   |
| Blinding        | Samples were defined based on the originating cell line and there was no prior knowledge for results, therefore blinding was not performed or relevant to data collection or analysis.                                                                                                                                                                                                                                                                                                                                                                                                                  |

## Reporting for specific materials, systems and methods

We require information from authors about some types of materials, experimental systems and methods used in many studies. Here, indicate whether each material, system or method listed is relevant to your study. If you are not sure if a list item applies to your research, read the appropriate section before selecting a response.

### Materials & experimental systems

| n/a                                 | Involved in the study                                     |
|-------------------------------------|-----------------------------------------------------------|
| <input type="checkbox"/>            | <input checked="" type="checkbox"/> Antibodies            |
| <input type="checkbox"/>            | <input checked="" type="checkbox"/> Eukaryotic cell lines |
| <input checked="" type="checkbox"/> | <input type="checkbox"/> Palaeontology and archaeology    |
| <input checked="" type="checkbox"/> | <input type="checkbox"/> Animals and other organisms      |
| <input checked="" type="checkbox"/> | <input type="checkbox"/> Human research participants      |
| <input checked="" type="checkbox"/> | <input type="checkbox"/> Clinical data                    |
| <input checked="" type="checkbox"/> | <input type="checkbox"/> Dual use research of concern     |

### Methods

| n/a                                 | Involved in the study                           |
|-------------------------------------|-------------------------------------------------|
| <input checked="" type="checkbox"/> | <input type="checkbox"/> ChIP-seq               |
| <input checked="" type="checkbox"/> | <input type="checkbox"/> Flow cytometry         |
| <input checked="" type="checkbox"/> | <input type="checkbox"/> MRI-based neuroimaging |

## Antibodies

### Antibodies used

Rabbit monoclonal anti-H2AK119ub1, Cell Signaling Technology, Cat# D27C4  
 Rabbit monoclonal anti-H3K27me3, Cell Signaling Technology, Cat# C36B11  
 Rabbit monoclonal anti-RING1B (WB), Cell Signaling Technology, Cat# D22F2  
 Mouse monoclonal anti-RING1B (IP), Atsuta et al., 2001  
 Rabbit monoclonal anti-SUZ12, Cell Signaling Technology, Cat# D39F6  
 Mouse monoclonal anti-H3, Cell Signaling Technology, Cat# 96C10  
 Rabbit polyclonal anti-PCGF6, LifeSpan BioSciences, Cat# LS-C482495, lot 101287  
 Rabbit polyclonal anti-PCGF2, Santa Cruz, Cat# sc-10744  
 Rabbit polyclonal anti-PCGF1, Klose lab purified and characterised (generated by PTUBS) - Blackledge et al., 2014  
 Rabbit monoclonal anti-PCGF3+PCGF5, Abcam, Cat# ab201510, lot GR291301-2, clone number EPR19475  
 Rabbit polyclonal anti-CBX7, Millipore, Cat# 07-981, lot 2989489  
 Rabbit monoclonal anti-BRG1, Abcam, Cat# ab110641, clone number EPNCIR111A  
 Mouse monoclonal anti-TBP, Abcam, Cat# ab818, clone number 1TBP18  
 Mouse monoclonal anti-FLAG, Sigma, Cat# F1804, clone number M2  
 Goat polyclonal anti-Mouse Alexa Fluor 488 conjugated, Invitrogen, Cat# A-11029  
 IRDye® 800CW Goat anti-Mouse IgG (H + L), LI-COR, Cat# 926-32210

IRDye® 800CW Goat anti-Rabbit IgG (H + L), LI-COR, Cat# 926-32211  
 IRDye® 680RD Goat anti-Mouse IgG (H + L), LI-COR, Cat# 926-68070  
 IRDye® 680RD Goat anti-Rabbit IgG (H + L), LI-COR, Cat# 926-68071

## Validation

anti-H2AK119ub1 - manufacturer-validated against human, mouse, rat and monkey cell lines by western blot  
 anti-H3K27me3 - manufacturer-validated against human, mouse, rat and monkey cell lines by western blot  
 anti-RING1B (WB) - manufacturer-validated against human, mouse, rat and monkey cell lines by western blot, validated here by protein tagging and knockout in mouse cell lines  
 anti-RING1B (IP) - validated in Atsuta et al., 2001  
 anti-SUZ12 - manufacturer-validated against human, mouse, rat and monkey cell lines by western blot, validated here by protein tagging in mouse cell lines  
 anti-H3 - manufacturer-validated against human, mouse, rat and monkey cell lines by western blot  
 anti-PCGF6 - manufacturer-validated by western blot and immunofluorescence for human and mouse cell lines, validated here by protein tagging in mouse cell lines  
 anti-PCGF2 - validated here by protein tagging in mouse cell lines  
 anti-PCGF1 - validated here by protein tagging in mouse cell lines  
 anti-PCGF3+PCGF5 - manufacturer-validated in mouse embryonic stem cells by knockout, validated here by protein tagging in mouse cell lines  
 anti-CBX7 - manufacturer-validated by western blot on mouse embryonic stem cell lysate, validated here by protein tagging in mouse cell lines  
 anti-BRG1 - manufacturer-validated in human, mouse and rat cell lines by western blot and in human cell lines by knockout and IP  
 anti-TBP - manufacturer-validated in U2OS and HeLa cells by CHIP-qPCR and cellular fractionation  
 anti-FLAG - manufacturer-validated in HeLa and CHO cells by western blot and COS-7 cells by immunofluorescence  
 Goat anti-Mouse - manufacturer-validated in human, mouse and Drosophila cells by immunofluorescence  
 IRDye® 800CW Goat anti-Mouse - manufacturer-validated for interaction with mouse IgG, IgM and IgA by ELISA, dot-blot and flow cytometry  
 IRDye® 800CW Goat anti-Rabbit - manufacturer-validated for interaction with rabbit IgG, IgM and IgA by ELISA, dot-blot and flow cytometry  
 IRDye® 680RD Goat anti-Mouse - manufacturer-validated for interaction with mouse IgG, IgM and IgA by ELISA, dot-blot and flow cytometry  
 IRDye® 680RD Goat anti-Rabbit - manufacturer-validated for interaction with rabbit IgG, IgM and IgA by ELISA, dot-blot and flow cytometry

## Eukaryotic cell lines

Policy information about [cell lines](#)

## Cell line source(s)

The PRC1 CKO mouse embryonic stem cell line was previously generated by the Klose lab (Blackledge et al., 2020) and is not available commercially.

All other cell lines (listed below) were generated in this study:

Mouse ESC: RING1B-HaloTag - this study  
 Mouse ESC: PRC1 CKO TIGRE RING1B-HaloTag - this study  
 Mouse ESC: PRC1 CKO TIGRE RING1B-NBM-HaloTag - this study  
 Mouse ESC: TIGRE RPCD-HaloTag - this study  
 Mouse ESC: HaloTag-PCGF1 - this study  
 Mouse ESC: PCGF2-HaloTag - this study  
 Mouse ESC: HaloTag-PCGF3 - this study  
 Mouse ESC: HaloTag-PCGF6 - this study  
 Mouse ESC: CBX7-HaloTag - this study  
 Mouse ESC: HaloTag-RYBP - this study  
 Mouse ESC: RING1B-HaloTag dTAG-SUZ12 - this study  
 Mouse ESC: PCGF2-HaloTag dTAG-SUZ12 - this study  
 Mouse ESC: HaloTag-PCGF6 dTAG-SUZ12 - this study  
 Mouse ESC: TIGRE HaloTag-PCGF1 - this study  
 Mouse ESC: TIGRE HaloTag-PCGF1 1-139 - this study  
 Mouse ESC: TIGRE HaloTag-PCGF1 140-259 - this study

## Authentication

All cell lines generated in this study were validated by PCR, sequencing, and western blotting, and by fluorescence microscopy where appropriate.

## Mycoplasma contamination

All cell lines were regularly tested for mycoplasma contamination and were found to be negative.

Commonly misidentified lines  
(See [ICLAC](#) register)

No commonly misidentified cell lines were used.
